# Supplementary material
Source: publisher site journal article supplement (https://www.dovepress.com/article/156176)

## Supplementary Material 1

### Low estimated glomerular filtration rate and pneumonia in stroke patients:

#### Findings from a prospective stroke registry in the East of England

#### CONTENTS:

**Supplemental Table 1:** Characteristics of sample population by level of estimated glomerular filtration rate (eGFR)

**Supplemental Table 2:** Results for interaction between patient's clinical characteristics and reduced eGFR for pneumonia

**Supplemental Table 3:** Association between level of estimated glomerular filtration rate and pneumonia in stroke patients (*After excluding those with top and bottom 25th percentile of the difference in estimated kidney function between admission and discharge*)

**Supplemental Table 4:** Association between level of estimated glomerular filtration rate and pneumonia in stroke patients (results from multinomial logistic regression) *by calendar year of hospital admission*

**Supplemental Table 5:** Association between level of estimated glomerular filtration rate pneumonia in new stroke patients

**Supplemental Table 6:** Association between pneumonia and mortality in stroke patients

**Supplemental Table 7:** Association between pneumonia and disability at discharge (using mRSscore) in stroke patients

**Supplemental Figure 1:** Kernel-Density plot of estimated glomerular filtration rate by pneumonia status

**Supplemental Table 1: Characteristics of sample population by level of estimated glomerular filtration rate (eGFR)**

| Characteristics                      | Level of eGFR (mL/min/1.73m <sup>2</sup> ) |                  |                  |                  |                  |                |
|--------------------------------------|--------------------------------------------|------------------|------------------|------------------|------------------|----------------|
|                                      | ≥90<br>(n=1,106)                           | 60-89<br>(4,866) | 45-59<br>(2,177) | 30-44<br>(1,427) | 15-29<br>(n=596) | <15<br>(n=157) |
| <b>Age (years)</b>                   | 59.7 ± 12.8                                | 77.1 ± 10.4      | 81.8 ± 8.9       | 84.2 ± 7.9       | 83.8 ± 8.5       | 78.5 ± 12.1    |
| <b>Sex (male)</b>                    | 62.8 (731)                                 | 48.9 (2,425)     | 42.6 (938)       | 38.5 (556)       | 40.8 (247)       | 50.3 (79)      |
| <b>Stroke history*, % (n)</b>        | 16.3 (173)                                 | 23.2 (1,100)     | 26.8 (572)       | 28.2 (394)       | 33.4 (196)       | 26.5 (39)      |
| <b>Stroke type (Ischemic), % (n)</b> | 80.4 (889)                                 | 84.9 (4,135)     | 88.3 (1,923)     | 90.7 (1,294)     | 93.3 (556)       | 92.4 (145)     |
| <b>OSCP classification*</b>          |                                            |                  |                  |                  |                  |                |
| - TACS                               | 14.5 (149)                                 | 19.7 (895)       | 22.8 (470)       | 23.8 (322)       | 27.5 (157)       | 23.8 (35)      |
| - PACS                               | 29.1 (299)                                 | 33.1 (1,503)     | 34.9 (720)       | 35.3 (478)       | 31.2 (178)       | 25.2 (37)      |
| - LACS                               | 24.7 (253)                                 | 23.6 (1,072)     | 21.9 (452)       | 20.9 (284)       | 18.3 (104)       | 15.7 (23)      |
| - POCS                               | 24.3 (249)                                 | 17.6 (799)       | 14.3 (294)       | 13.4 (181)       | 14.4 (82)        | 16.3 (24)      |
| - Other                              | 7.3 (76)                                   | 5.9 (269)        | 6.1 (127)        | 6.5 (89)         | 8.5 (49)         | 19.1 (28)      |
| <b>Pre-stroke mRS*</b>               |                                            |                  |                  |                  |                  |                |
| - 0                                  | 76.7 (779)                                 | 67.8 (3,121)     | 60.7 (1,236)     | 51.9 (677)       | 42.1 (230)       | 39.7 (50)      |
| - 1                                  | 9.9 (103)                                  | 12.3 (566)       | 11.2 (228)       | 12.8 (167)       | 15.4 (84)        | 15.1 (19)      |
| - 2                                  | 5.7 (59)                                   | 7.4 (341)        | 8.9 (182)        | 10.1 (131)       | 12.1 (66)        | 11.9 (15)      |
| - 3                                  | 4.4 (46)                                   | 7.4 (339)        | 11.4 (232)       | 14.0 (183)       | 17.8 (97)        | 16.7 (23)      |
| - 4                                  | 2.1 (22)                                   | 3.7 (171)        | 4.9 (100)        | 8.3 (108)        | 10.3 (56)        | 7.1 (9)        |
| - 5                                  | 1.3 (13)                                   | 1.4 (63)         | 2.9 (58)         | 2.9 (38)         | 2.4 (13)         | 9.5 (12)       |
| <b>Diabetes, % (n)</b>               | 11.6 (128)                                 | 11.6 (564)       | 13.4 (291)       | 15.3 (218)       | 21.1 (126)       | 28.0 (44)      |
| <b>Hypertension, % (n)</b>           | 32.0 (354)                                 | 46.2 (2,249)     | 48.9 (1,064)     | 52.6 (750)       | 59.4 (354)       | 59.9 (94)      |
| <b>Dyslipidemia, % (n)</b>           | 11.5 (127)                                 | 9.8 (478)        | 8.5 (186)        | 7.6 (109)        | 8.1 (48)         | 9.6 (15)       |
| <b>Coronary heart disease, % (n)</b> | 9.5 (105)                                  | 18.7 (912)       | 23.3 (507)       | 29.4 (419)       | 35.2 (210)       | 37.6 (59)      |
| <b>Heart failure, % (n)</b>          | 3.4 (38)                                   | 7.5 (365)        | 12.4 (271)       | 17.8 (254)       | 28.0 (167)       | 27.4 (43)      |
| <b>Atrial fibrillation,% (n)</b>     | 8.1 (89)                                   | 22.6 (1,098)     | 29.2 (635)       | 32.4 (463)       | 36.1 (215)       | 27.4 (43)      |
| <b>COPD, % (n)</b>                   | 5.4 (60)                                   | 6.6 (321)        | 6.9 (150)        | 7.9 (113)        | 10.2 (61)        | 9.6 (15)       |
| <b>Asthma, % (n)</b>                 | 8.2 (91)                                   | 8.5 (413)        | 6.8 (148)        | 8.1 (115)        | 8.1 (48)         | 7.0 (11)       |
| <b>Lung cancer, % (n)</b>            | 1.7 (19)                                   | 0.9 (42)         | 0.7 (16)         | 0.4 (6)          | 0.3 (2)          | 0.0 (0)        |
| <b>Length of stay (days)</b>         | 6 (2 – 12)                                 | 7 (3 – 16)       | 10 (4 – 20)      | 11 (4 – 21)      | 11 (5 – 23)      | 8 (3 – 18)     |

Abbreviations: OSCP=Oxfordshire Community Stroke Project; TACS: total anterior circulation stroke; PACS: partial anterior circulation stroke; LACS: lacunar stroke; POCS: posterior circulation stroke; mRS=modified Rankin score

Continuous variables with normal distribution are presented as mean ± standard deviation and non-normal distribution are presented as median (interquartile interval); categorical variables are presented as percentages (n); \*253 participants missing information on previous stroke, 631 on OSCP classification and 674 on mRS

**Supplemental table 2: Results for interaction between patient's clinical characteristics and reduced eGFR for pneumonia**

|                                  | <b>Patient<br/>characteristic/reduced<br/>eGFR (0/0)</b> | <b>Patient<br/>characteristic/reduced<br/>eGFR (1/1)</b> |
|----------------------------------|----------------------------------------------------------|----------------------------------------------------------|
| <b>In hospital</b>               |                                                          |                                                          |
|                                  | (sHR; 95% CI)                                            |                                                          |
| Age                              | Ref. [1]                                                 | 1.36 (0.61 – 3.02)                                       |
| Sex                              | Ref. [1]                                                 | 1.09 (0.89 – 1.34)                                       |
| Pre-stroke mRS                   | Ref. [1]                                                 | 0.78 (0.58 – 1.06)                                       |
| Diabetes status                  | Ref. [1]                                                 | 0.96 (0.73 – 1.26)                                       |
| Stroke type                      | Ref. [1]                                                 | 1.17 (0.85 – 1.59)                                       |
| <b>After hospital discharge*</b> |                                                          |                                                          |
|                                  | (sHR; 95% CI)                                            |                                                          |
| Age                              | Ref. [1]                                                 | 0.70 (0.36 – 1.28)                                       |
| Sex                              | Ref. [1]                                                 | 0.88 (0.68 – 1.12)                                       |
| Pre-stroke mRS                   | Ref. [1]                                                 | 0.70 (0.45 – 1.09)                                       |
| Diabetes status                  | Ref. [1]                                                 | 1.27 (0.91 – 1.76)                                       |
| Stroke type                      | Ref. [1]                                                 | 1.00 (0.64 – 1.55)                                       |

Abbreviations: sHR=sub-distribution hazard, CI=confidence interval

Adjusted for: age, sex, stroke type, pre-stroke modified Rankin score, Oxfordshire Community Stroke Project (stroke severity, asthma, chronic obstructive pulmonary disease, lung cancer, diabetes, hypertension, dyslipidemia, coronary heart disease, heart failure, arterial fibrillation)

\*In patients that were alive at discharge (N=8,021)

**Supplemental Table 3: Association between low estimated glomerular filtration rate (and pneumonia in stroke patients) (After excluding those with top and bottom 25th percentile of the difference in estimated kidney function between admission and discharge)**

|                                  | Low eGFR (<60mL/min/1.73m <sup>2</sup> ) |                    |
|----------------------------------|------------------------------------------|--------------------|
|                                  | No<br>(n=4,827)                          | Yes<br>(n=3,500)   |
| <b>In hospital</b>               |                                          |                    |
| Overall                          | (sHR; 95% CI)                            |                    |
| Events, % (n)                    | 11.9 (576)                               | 17.6 (615)         |
| - Model 1                        | Ref. [1]                                 | 1.13 (1.00 – 1.26) |
| - Model 2                        | Ref. [1]                                 | 1.09 (0.97 – 1.23) |
| - Model 3                        | Ref. [1]                                 | 1.09 (0.96 – 1.23) |
| - Model 4                        | Ref. [1]                                 | 1.06 (0.94 – 1.20) |
| Aspiration                       | (sHR; 95% CI)                            |                    |
| Events, % (n)                    | 7.0 (340)                                | 10.9 (381)         |
| - Model 1                        | Ref. [1]                                 | 1.17 (1.01 – 1.37) |
| - Model 2                        | Ref. [1]                                 | 1.15 (0.98 – 1.34) |
| - Model 3                        | Ref. [1]                                 | 1.15 (0.98 – 1.34) |
| - Model 4                        | Ref. [1]                                 | 1.12 (0.96 – 1.31) |
| Non-aspiration                   | (sHR; 95% CI)                            |                    |
| Events, % (n)                    | 4.9 (236)                                | 6.7 (234)          |
| - Model 1                        | Ref. [1]                                 | 1.05 (0.87 – 1.27) |
| - Model 2                        | Ref. [1]                                 | 1.01 (0.84 – 1.23) |
| - Model 3                        | Ref. [1]                                 | 1.01 (0.83 – 1.22) |
| - Model 4                        | Ref. [1]                                 | 0.97 (0.80 – 1.18) |
| <b>After hospital discharge*</b> |                                          |                    |
| Overall                          | (sHR; 95% CI)                            |                    |
| Events, % (n)                    | 11.5 (493)                               | 16.1 (371)         |
| - Model 1                        | Ref. [1]                                 | 1.33 (1.16 – 1.52) |
| - Model 2                        | Ref. [1]                                 | 1.29 (1.12 – 1.48) |
| - Model 3                        | Ref. [1]                                 | 1.30 (1.13 – 1.50) |
| - Model 4                        | Ref. [1]                                 | 1.21(1.06 – 1.40)  |
| Aspiration, % (n)                | (sHR; 95% CI)                            |                    |
| Events                           | 4.4 (189)                                | 4.9 (112)          |
| - Model 1                        | Ref. [1]                                 | 1.04 (0.81 – 1.32) |
| - Model 2                        | Ref. [1]                                 | 1.03 (0.81 – 1.31) |
| - Model 3                        | Ref. [1]                                 | 1.02 (0.80 – 1.30) |
| - Model 4                        | Ref. [1]                                 | 0.98 (0.77 – 1.25) |
| Non-aspiration, % (n)            | (sHR; 95% CI)                            |                    |
| Events                           | 7.1 (304)                                | 11.3 (259)         |
| - Model 1                        | Ref. [1]                                 | 1.50 (1.27 – 1.78) |
| - Model 2                        | Ref. [1]                                 | 1.44 (1.21 – 1.71) |
| - Model 3                        | Ref. [1]                                 | 1.46 (1.23 – 1.73) |
| - Model 4                        | Ref. [1]                                 | 1.35 (1.14 – 1.60) |

Abbreviations: eGFR=estimated glomerular filtration rate, sHR=sub-distribution hazard ratio, CI=confidence interval

Model 1: age, sex

Model 2: Model 1 + history of stroke, stroke type, pre-stroke modified Rankin score, Oxfordshire Community Stroke Project (stroke severity)

Model 3: Model 2 + asthma, chronic obstructive pulmonary disease, lung cancer

Model 4: Model 3 + diabetes, hypertension, dyslipidemia, coronary heart disease, heart failure, arterial fibrillation

\*In patients that were alive at discharge (N=6,588)

**Supplemental Table 4: Association between low estimated glomerular filtration rate and pneumonia in stroke patients by calendar year of hospital admission\***

| In hospital                     | Estimated glomerular filtration rate (mL/min/1.73m <sup>2</sup> ) |                    |
|---------------------------------|-------------------------------------------------------------------|--------------------|
|                                 | eGFR $\geq$ 60                                                    | eGFR<60            |
|                                 | (sHR; 95% CI)                                                     |                    |
| <b>Overall</b>                  |                                                                   |                    |
| 2003-2006 (n=3,454)             | Ref. [1]                                                          | 0.96 (0.79 – 1.16) |
| 2007-2010 (n=2,916)             | Ref. [1]                                                          | 1.18 (0.98 – 1.38) |
| 2011-2015 (n=3,959)             | Ref. [1]                                                          | 1.06 (0.89 – 1.25) |
| <b>Aspiration</b>               |                                                                   |                    |
| 2003-2006                       | Ref. [1]                                                          | 1.07 (0.84 – 1.37) |
| 2007-2010                       | Ref. [1]                                                          | 1.23 (0.93 – 1.51) |
| 2011-2015                       | Ref. [1]                                                          | 1.01 (0.81 – 1.26) |
| <b>Non-aspiration</b>           |                                                                   |                    |
| 2003-2006                       | Ref. [1]                                                          | 0.78 (0.56 – 1.08) |
| 2007-2010                       | Ref. [1]                                                          | 1.37 (0.98 – 1.92) |
| 2011-2015                       | Ref. [1]                                                          | 1.12 (0.85 – 1.46) |
| <b>After hospital discharge</b> |                                                                   |                    |
| <b>Overall</b>                  |                                                                   |                    |
| 2003-2006 (n=2,458)             | Ref. [1]                                                          | 1.25 (1.02 – 1.54) |
| 2007-2010 (n=2,267)             | Ref. [1]                                                          | 1.37 (1.07 – 1.77) |
| 2011-2015 (n=3,296)             | Ref. [1]                                                          | 1.27 (1.04 – 1.52) |
| <b>Aspiration</b>               |                                                                   |                    |
| 2003-2006                       | Ref. [1]                                                          | 0.93 (0.65 – 1.34) |
| 2007-2010                       | Ref. [1]                                                          | 0.68 (0.44 – 1.05) |
| 2011-2015                       | Ref. [1]                                                          | 0.88 (0.58 – 1.35) |
| <b>Non-aspiration</b>           |                                                                   |                    |
| 2003-2006                       | Ref. [1]                                                          | 1.44 (1.12 – 1.86) |
| 2007-2010                       | Ref. [1]                                                          | 1.34 (1.02 – 1.76) |
| 2011-2015                       | Ref. [1]                                                          | 1.37 (1.00 – 1.88) |

\*Adjusted for age, sex, history of stroke, stroke type, pre-stroke modified Rankin score, Oxfordshire Community Stroke Project (stroke severity), asthma, chronic obstructive pulmonary disease, lung cancer, diabetes, hypertension, dyslipidemia, coronary heart disease, heart failure, arterial fibrillation  
sHR=sub-distribution hazard

**Supplemental Table 5: Association between level of estimated glomerular filtration rate and pneumonia in new stroke patients**

|                  | Level of estimated glomerular filtration rate (mL/min/1.73m <sup>2</sup> ) |                    |                    |                    |                    |                    |
|------------------|----------------------------------------------------------------------------|--------------------|--------------------|--------------------|--------------------|--------------------|
|                  | ≥90<br>(n=887)                                                             | 60-89<br>(n=3,649) | 45-59<br>(n=1,562) | 30-44<br>(n=1,005) | 15-29<br>(n=391)   | <15<br>(n=108)     |
| In-hospital      | (sHR; 95% CI)                                                              |                    |                    |                    |                    |                    |
| Events           | 8.7 (77)                                                                   | 12.3 (448)         | 16.7 (261)         | 19.7 (198)         | 21.7 (85)          | 18.5 (20)          |
| - Model 1        | Ref. [1]                                                                   | 0.64 (0.49 – 0.83) | 0.71 (0.53 – 0.94) | 0.76 (0.56 – 1.03) | 0.86 (0.61 – 1.20) | 0.88 (0.54 – 1.45) |
| - Model 2        | Ref. [1]                                                                   | 0.69 (0.53 – 0.89) | 0.74 (0.56 – 0.98) | 0.80 (0.60 – 1.09) | 0.79 (0.56 – 1.10) | 0.78 (0.47 – 1.29) |
| - Model 3        | Ref. [1]                                                                   | 0.70 (0.54 – 0.91) | 0.75 (0.56 – 0.99) | 0.84 (0.62 – 1.13) | 0.85 (0.60 – 1.19) | 0.92 (0.57 – 1.50) |
| - Model 4        | Ref. [1]                                                                   | 0.70 (0.54 – 0.91) | 0.73 (0.55 – 0.98) | 0.81 (0.60 – 1.10) | 0.80 (0.57 – 1.13) | 0.89 (0.54 – 1.45) |
| After discharge* | (sHR; 95% CI)                                                              |                    |                    |                    |                    |                    |
| - Events         | 7.5 (82)                                                                   | 12.3 (507)         | 14.7 (227)         | 16.4 (150)         | 21.3 (60)          | 17.7 (11)          |
| - Model 1        | Ref. [1]                                                                   | 1.39 (0.93 – 2.09) | 1.68 (1.07 – 2.63) | 2.06 (1.28 – 3.31) | 2.15 (1.17 – 3.95) | 4.50 (1.89 – 10.7) |
| - Model 2        | Ref. [1]                                                                   | 1.35 (0.90 – 2.02) | 1.60 (1.02 – 2.52) | 1.95 (1.21 – 3.15) | 2.04 (1.11 – 3.76) | 4.33 (1.82 – 10.3) |
| - Model 3        | Ref. [1]                                                                   | 1.32 (0.88 – 2.00) | 1.61 (1.02 – 2.53) | 1.92 (1.19 – 3.10) | 1.99 (1.07 – 3.67) | 4.40 (1.84 – 10.5) |
| - Model 4        | Ref. [1]                                                                   | 1.32 (0.87 – 1.98) | 1.56 (0.99 – 2.46) | 1.84 (1.14 – 2.98) | 1.87 (1.00 – 3.45) | 4.07 (1.70 – 9.75) |

Abbreviations: sHR=sub-distribution hazard CI=confidence interval

Model 1: age, sex

Model 2: Model 1 + stroke type, pre-stroke modified Rankin score, Oxfordshire Community Stroke Project (stroke severity)

Model 3: Model 2 + asthma, chronic obstructive pulmonary disease, lung cancer

Model 4: Model 3 + diabetes, hypertension, dyslipidemia, coronary heart disease, heart failure, arterial fibrillation

\*In patients that were alive at discharge (N=6,003)

**Supplemental Table 7: Association between pneumonia and mortality in stroke patients**

| In hospital               | No           | yes                |
|---------------------------|--------------|--------------------|
| Overall                   | (OR; 95% CI) |                    |
| Events, % (n)             | 47.2 (4,157) | 81.2 (1233)        |
| - Model 1                 | Ref. [1]     | 2.28 (1.07 – 2.52) |
| - Model 2                 | Ref. [1]     | 1.98 (1.79 – 2.19) |
| - Model 3                 | Ref. [1]     | 1.98 (1.79 – 2.19) |
| - Model 4                 | Ref. [1]     | 1.93 (1.74 – 2.14) |
| After hospital discharge* | No           | Yes                |
| Overall                   | (OR; 95% CI) |                    |
| Events, % (n)             | 35.5 (2,479) | 58.1 (603)         |
| - Model 1                 | Ref. [1]     | 1.43 (1.32 – 1.55) |
| - Model 2                 | Ref. [1]     | 1.42 (1.31 – 1.54) |
| - Model 3                 | Ref. [1]     | 1.42 (1.31 – 1.54) |
| - Model 4                 | Ref. [1]     | 1.41 (1.30 – 1.53) |

Abbreviations: OR=odds ratio, CI=confidence interval

Model 1: age, sex, estimated glomerular filtration rate

Model 2: Model 1 + stroke type, pre-stroke modified Rankin score, Oxfordshire Community Stroke Project (stroke severity)

Model 3: Model 2 + asthma, chronic obstructive pulmonary disease, lung cancer

Model 4: Model 3 + diabetes, hypertension, dyslipidemia, coronary heart disease, heart failure, arterial fibrillation

\*In patients that were alive at discharge (N=8,021)



**Supplemental Table 8: Association between pneumonia and disability at discharge (using mRS score) in stroke patients\***

| In hospital | No           | yes                |
|-------------|--------------|--------------------|
| Overall     | (OR; 95% CI) |                    |
| - Model 1   | Ref. [1]     | 2.89 (2.57 – 3.22) |
| - Model 2   | Ref. [1]     | 2.62 (2.32 – 2.96) |
| - Model 3   | Ref. [1]     | 2.63 (2.33 – 2.97) |
| - Model 4   | Ref. [1]     | 2.57 (2.27 – 2.90) |

Abbreviations: OR=odds ratio, CI=confidence interval

Model 1: age, sex, estimated glomerular filtration rate

Model 2: Model 1 + stroke type, pre-stroke modified Rankin score, Oxfordshire Community Stroke Project (stroke severity)

Model 3: Model 2 + asthma, chronic obstructive pulmonary disease, lung cancer

Model 4: Model 3 + diabetes, hypertension, dyslipidemia, coronary heart disease, heart failure, arterial fibrillation

**\*Association was only examined for in hospital pneumonia because disability information was only available at discharge**

**Supplemental Figure 1: Kernel-Density plot of estimated glomerular filtration rate by pneumonia status**

A) By in-hospital pneumonia

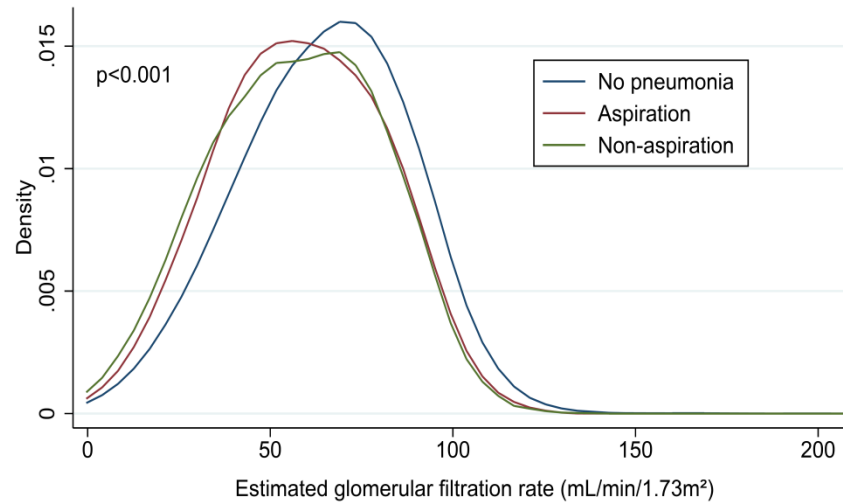

B) By pneumonia After hospital discharge

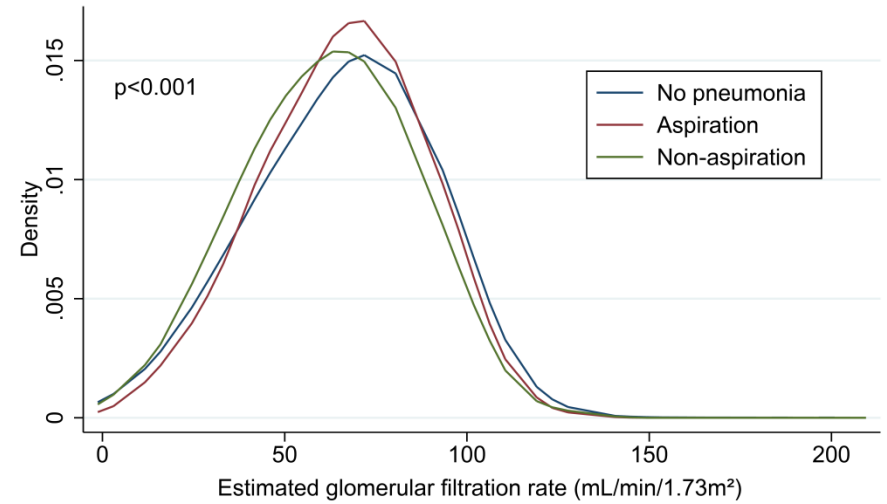

Supplement: Supplementary file 1 [file get_supplementary_file.php%3Ff%3D156176.pdf]
